# Supplementary material for: Modelling Anopheles gambiae s.s. Population Dynamics with Temperature- and Age-Dependent Survival
Source: PubMed Central journal article supplement (PMC4483682; doi:10.3390/ijerph120605975), 2015-05-28
Supplement: ijerph-12-05975-s001.pdf [file ijerph-12-05975-s001.pdf]

## Modelling *Anopheles gambiae* s.s. Population Dynamics with Temperature- and Age-Dependent Survival

**Table S1.** Comparison of the MLE-defined best-fit gamma distribution to the larval mortality data at fixed values of  $\alpha$ . The fixed-value fit closest to the best-fit is indicated by \*.

| Temperature | Value of $\alpha$ | Difference in AIC between Best-Fit and Fixed-Alpha Value |        |
|-------------|-------------------|----------------------------------------------------------|--------|
| 23 °C       | MLE-determined    | 7.27                                                     |        |
|             | Fixed             | 5                                                        | 22.06  |
|             |                   | 6                                                        | 6.06   |
|             |                   | 7                                                        | 0.24 * |
|             |                   | 8                                                        | 1.62   |
|             |                   | 9                                                        | 8.32   |
|             |                   | 10                                                       | 19.08  |
|             |                   | 11                                                       | 33.06  |
|             |                   | 12                                                       | 49.61  |
| 27 °C       | MLE-determined    | 5.64                                                     |        |
|             | Fixed             | 5                                                        | 1.46   |
|             |                   | 6                                                        | 0.41 * |
|             |                   | 7                                                        | 5.17   |
|             |                   | 8                                                        | 13.95  |
|             |                   | 9                                                        | 25.65  |
|             |                   | 10                                                       | 39.57  |
|             |                   | 11                                                       | 55.2   |
|             |                   | 12                                                       | 72.19  |
| 31 °C       | MLE-determined    | 7.11                                                     |        |
|             | Fixed             | 5                                                        | 18.09  |
|             |                   | 6                                                        | 4.4    |
|             |                   | 7                                                        | 0.04 * |
|             |                   | 8                                                        | 2.25   |
|             |                   | 9                                                        | 9.32   |
|             |                   | 10                                                       | 20.08  |
|             |                   | 11                                                       | 33.74  |
|             |                   | 12                                                       | 49.74  |
| 35 °C       | MLE-determined    | 11.11                                                    |        |
|             | Fixed             | 5                                                        | 210.29 |
|             |                   | 6                                                        | 130.67 |
|             |                   | 7                                                        | 76.24  |
|             |                   | 8                                                        | 39.81  |
|             |                   | 9                                                        | 16.86  |
|             |                   | 10                                                       | 4.32   |
|             |                   | 11                                                       | 0.04 * |
|             |                   | 12                                                       | 2.5    |

**Table S2.** Comparison of the MLE-defined best fit gamma distribution to adult mortality data, with the fits given a fixed value of  $\alpha$ . The fixed-value fit closest to the best fit is indicated by \*.

| Temperature | Value of $\alpha$ | Difference in AIC between Best Fit and Fixed-Alpha Fit |        |
|-------------|-------------------|--------------------------------------------------------|--------|
| 23 °C       | MLE-determined    | 4.675                                                  |        |
|             | Fixed             | 1                                                      | 90.85  |
|             |                   | 2                                                      | 32.05  |
|             |                   | 3                                                      | 9.5    |
|             |                   | 4                                                      | 1.25   |
|             |                   | 5 *                                                    | 0.24   |
| 27 °C       | MLE-determined    | 3.401                                                  |        |
|             | Fixed             | 1                                                      | 137.87 |
|             |                   | 2                                                      | 30.42  |
|             |                   | 3 *                                                    | 1.86   |
|             |                   | 4                                                      | 3.33   |
|             |                   | 5                                                      | 19.89  |
| 31 °C       | MLE-determined    | 1.844                                                  |        |
|             | Fixed             | 1                                                      | 40.01  |
|             |                   | 2 *                                                    | 0.86   |
|             |                   | 3                                                      | 34.13  |
|             |                   | 4                                                      | 93.67  |
|             |                   | 5                                                      | n/a    |

**Table S3.** Model sensitivity to changes in inferred parameter values.

| Model | Relative Change in Likelihood Given a Relative Change in Parameter |         |         |         |        |            |
|-------|--------------------------------------------------------------------|---------|---------|---------|--------|------------|
|       | $n_F$                                                              | $q$     | $\mu_E$ | $\mu_C$ | $\tau$ | $\Delta T$ |
| 1     | 0.026                                                              | 98.191  | 45.755  | 0.029   | 0.029  | 10.287     |
| 2     | 0.0003                                                             | 387.112 | 32.421  | <0.001  | 0.31   | 65.249     |
| 3     | 23.901                                                             | 175.956 | 56.865  | 40.782  | 0.004  | 49.933     |
| 4     | 1.003                                                              | 495.651 | 84.885  | 3.176   | 0.002  | 197.08     |

© 2015 by the authors; licensee MDPI, Basel, Switzerland. This article is an open access article distributed under the terms and conditions of the Creative Commons Attribution license (<http://creativecommons.org/licenses/by/4.0/>).
